# Supplementary material for: Transcriptional mapping of the primary somatosensory cortex upon sensory deprivation
Source: PubMed Central journal article supplement (PMC5965344; doi:10.1093/gigascience/gix081), 2017-08-23

# 1 2 3 4 1 **Transcriptional mapping of the primary somatosensory cortex upon sensory deprivation**

5  
6 2 Koen Kole<sup>1,2</sup>, Yutaro Komuro<sup>1</sup>, Jan Provaznik<sup>3</sup>, Jelena Pistolic<sup>3</sup>,

7  
8 3 Vladimir Benes<sup>3</sup>, Paul Tiesinga<sup>2</sup>, Tansu Celikel<sup>1</sup>

9  
10 4 (1) Department of Neurophysiology, (2) Department of Neuroinformatics, Donders Institute for  
11 5 Brain, Cognition, and Behaviour, Radboud University, Nijmegen - the Netherlands. (3) European  
12 6 Molecular Biology Laboratory (EMBL), Genomics Core Facility, Heidelberg - Germany

13  
14 7 E-mail addresses (in the order of appearance): [k.kole@neurophysiology.nl](mailto:k.kole@neurophysiology.nl),  
15 8 [y.komuro@neurophysiology.nl](mailto:y.komuro@neurophysiology.nl), [jan.provaznik@embl.de](mailto:jan.provaznik@embl.de), [jelena.pistollic@embl.de](mailto:jelena.pistollic@embl.de),  
16 9 [benes@embl.de](mailto:benes@embl.de), [p.tiesinga@science.ru.nl](mailto:p.tiesinga@science.ru.nl), [celikel@neurophysiology.nl](mailto:celikel@neurophysiology.nl) (corresponding author)

## 18 19 10 20 11 **Background (138)**

22 12 Experience-dependent plasticity (EDP) is essential for anatomical and functional maturation of  
23 13 sensory circuits during development. Although the principal synaptic and circuit mechanisms of  
24 14 EDP are increasingly well studied experimentally and computationally, its molecular mechanisms  
25 15 remain largely elusive. EDP can be readily studied in the rodent barrel cortex, where each 'barrel  
26 16 column' preferentially represents deflections of its own principal whisker. Depriving select  
27 17 whiskers while sparing their neighbours introduces competition between barrel columns,  
28 18 ultimately leading to weakening of intracortical, translaminal (i.e. Cortical Layer (L)4-to-L2/3) feed-  
29 19 forward excitatory projections in the deprived columns. The same synapses are potentiated in the  
30 20 neighbouring spared columns. These experience-dependent alterations of synaptic strength are  
31 21 thought to underlie somatosensory map plasticity. We used RNA sequencing in this model system  
32 22 to uncover cortical-column and -layer specific changes on the transcriptome level that are induced  
33 23 by altered sensory experience.

## 34 24 **Findings (66)**

35 25 Column- and layer-specific barrel cortical tissues were collected from juvenile mice with all  
36 26 whiskers intact and mice that received 11-12 days long whisker (C-row) deprivation before high  
37 27 quality RNA was purified and sequenced. The current dataset entails an average of 50 million  
38 28 paired-end reads per sample, 75 base pairs in length. On average, 90.15% of reads could be  
39 29 uniquely mapped to the mm10 reference mouse genome.

## 40 30 **Conclusions (32) – Word total for the abstract: 246 out of 250**

41 31 The current data reveal the transcriptional changes in gene expression in the barrel cortex upon  
42 32 altered sensory experience in juvenile mice and will help to molecularly map the mechanisms of  
43 33 cortical plasticity.

44  
45  
46  
47  
48  
49  
50  
51  
52  
53  
54  
55  
56  
57  
58  
59  
60  
61  
62  
63  
64  
65

1  
2  
3  
4  
5  
6  
7  
8  
9  
10  
11  
12  
13  
14  
15  
16  
17  
18  
19  
20  
21  
22  
23  
24  
25  
26  
27  
28  
29  
30  
31  
32  
33  
34  
35  
36  
37  
38  
39  
40  
41  
42  
43  
44  
45  
46  
47  
48  
49  
50  
51  
52  
53  
54  
55  
56  
57  
58  
59  
60  
61  
62  
63  
64  
65

34 **Data Description**

35 **Context**

36 Sensory experience powerfully shapes neural circuits. Changes due to sensory organ deprivation  
37 such as eye closure, digit amputation, and whisker trimming provide powerful means for studying  
38 mechanisms of experience dependent cortical plasticity.

39 In the whisker system experience dependent plasticity is most commonly studied in the  
40 barrel cortex subfield of the primary somatosensory cortex where neural representations of  
41 whiskers change in response to altered patterns of incoming sensory information. As originally  
42 shown in the barrel cortex [1] sensory deprivation induced by transient whisker trimming is  
43 sufficient to perturb neural receptive fields both during development and in adulthood. Previous  
44 work has also shown that the cellular basis of deprivation-induced decreases in whisker evoked  
45 representations are primarily due to a reduction of synaptic strength in monosynaptically  
46 connected feed-forward neuronal networks in behaving animals [2, 3]. Conversely whisker  
47 sparing induced enhancement in whisker representation is mediated at least in part by the long-  
48 term synaptic facilitation expressed along the L4 projections *in vivo* [4]. Identification of the  
49 molecular events that mediate these bidirectional changes in synaptic connectivity will benefit  
50 from systematic analysis of the gene transcription. Therefore, we performed RNA sequencing in  
51 the barrel cortex with or without sensory deprivation across cortical layers 2-4. This database will  
52 assist molecular and cellular neurobiologists in addressing the molecular mechanisms associated  
53 with experience dependent plasticity, and will enable statistical approaches to determine the  
54 dynamics of the coupled changes across molecular pathways as cortical circuits undergo plastic  
55 changes in their organization.

56

1  
2  
3  
4  
5  
6  
7  
8  
9  
10  
11  
12  
13  
14  
15  
16  
17  
18  
19  
20  
21  
22  
23  
24  
25  
26  
27  
28  
29  
30  
31  
32  
33  
34  
35  
36  
37  
38  
39  
40  
41  
42  
43  
44  
45  
46  
47  
48  
49  
50  
51  
52  
53  
54  
55  
56  
57  
58  
59  
60  
61  
62  
63  
64  
65

57 **Methods**

58 *Animals*

59 All experiments were performed in accordance with the Animal Ethics Committee of the Radboud  
60 University in Nijmegen, the Netherlands. Pregnant wild type mice (Charles River, stock number  
61 000664) [RRID:NCBITaxon\_10090] were kept at a 12-hour light/dark cycle with access to food  
62 *ad libitum*. Cages were checked for birth daily. To induce experience-dependent plasticity, pups  
63 underwent bilateral plucking of their C-row whiskers under isoflurane anaesthesia at P12 (**Figure**  
64 **1**). Control animals were not plucked but anaesthetized and handled similarly. After recovery pups  
65 were returned to their home cage. Every other day pups were checked for whisker regrowth,  
66 which were plucked if present. At P23-P24, pups were randomly selected from their litter for slice  
67 preparation and tissue collection. For each experimental condition (i.e. whisker deprived or  
68 control), 4 female pups were used, thus each group consisted of 4 independent biological samples  
69 (also known as biological replicates). Samples from cortical layer (L) 4 and L2/3 were treated  
70 independently with their own corresponding groups of control, deprived, 1<sup>st</sup> order spared, 2<sup>nd</sup> order  
71 spared columns as detailed in Figure 1.

72  
73 *Figure 1 is about here*  
74

75 *Slice preparation and sample collection*

76 Pups were anaesthetized using isoflurane and then perfused with ice-cold carbogenated slicing  
77 medium (108 mM ChCl, 3 mM KCl, 26 mM NaHCO<sub>3</sub>, 1.25 mM NaH<sub>2</sub>PO<sub>4</sub>, 25 mM glucose, 1 mM  
78 CaCl<sub>2</sub>, 6 mM MgSO<sub>4</sub> and 3 mM Na-pyruvate). Next, pups were decapitated before the brain was  
79 quickly dissected out and 400 µm thalamocortical slices from each hemisphere were prepared as  
80 described before [2, 3]. Slices were transferred to 37 degrees Celsius carbogenated ACSF (120  
81 mM NaCl, 3.5 mM KCl, 10 mM glucose, 2.5 mM CaCl<sub>2</sub>, 1.3 mM MgSO<sub>4</sub>, 25 mM NaHCO<sub>3</sub> and 1.25

1  
2  
3  
4 82 mM NaH<sub>2</sub>PO<sub>4</sub>) where they were kept for 30 minutes and recovered at room temperature for  
5  
6 83 another 30 minutes until tissue collection.

7  
8  
9 84

10 85 After incubation, slices were placed under a Nikon Eclipse FN1 microscope. The holding chamber  
11  
12  
13 86 was continuously perfused with room temperature carbogenated ACSF. Due to the 55 degree  
14  
15 87 cut, slices were obtained in which S1 barrels from specific rows (A-E) could be identified [2]. A  
16  
17 88 thin, long glass pipette was pulled using a Sutter instruments P-2000 pipette puller and was used  
18  
19 89 to make intercolumnar incisions from L1 to the bottom of L4 after which the slice was placed under  
20  
21  
22 90 a binocular dissection microscope where the location of specific barrel columns could now be  
23  
24 91 readily identified by eye. A sterile 32G needle was then used to cut out L2/3 and L4 separately  
25  
26 92 from each column. Tissue from columns A/E and B/D were pooled as they both constitute second  
27  
28 93 and first order spared whiskers, respectively. Immediately after dissection, tissue samples were  
29  
30 94 snap frozen in liquid nitrogen and stored at -80 degrees Celsius until further use. All tools that  
31  
32  
33 95 came into direct contact with brain tissue were treated using RNaseZap in order to minimize  
34  
35 96 RNase contamination.

36  
37  
38 97

#### 39 40 98 *RNA isolation and quality control*

41  
42 99 Tissue samples originating from the same rows and layers were pooled within each animal. From  
43  
44 100 control animals, only the C column tissues were used (also see *Re-use potential*). Tissue was  
45  
46 101 quickly dissolved in Qiazol (Qiagen #79306), after which RNA was isolated using the miRNeasy  
47  
48 102 Mini kit (Qiagen #217004), DNase treated (Thermo Scientific, #EN0521) and cleaned up using  
49  
50 103 RNeasy MinElute kit (Qiagen #74204), all following the manufacturer's instructions. Samples were  
51  
52  
53 104 then stored at -80 degrees Celsius until further processing.

54  
55  
56 105

57  
58 106 RNA sample integrity was determined using Agilent Tapestation (High Sensitivity RNA  
59  
60 107 Screentape). Sample RINs ranged from 7.1 to 8.8. To further assess RNA purity and integrity,

61  
62  
63  
64  
65

1  
2  
3  
4 108 RNA samples were used in RT-PCR to confirm that cDNA could be produced and that a large  
5  
6 109 (~1000 bp) amplicon could be obtained. To produce cDNA, SuperScript® II Reverse  
7  
8 110 Transcriptase (Thermo Scientific #18064014) and random hexamer primers (Roche  
9  
10 111 #11034731001) were used. The resulting cDNA was then added to a PCR reaction mix which  
11  
12  
13 112 further consisted of Jumpstart Ready Mix (Sigma P2893) and exon-exon junction spanning  
14  
15 113 CamKII primers (FW TCCAACATTGTACGCCTCCAT; RV TGTTGGTGCTGTCGGAAGAT).  
16  
17 114 From all cDNA samples a fragment of the expected size could be amplified, suggesting that the  
18  
19 115 RNA samples contained pure RNA of sufficient integrity. All RNA samples thus passed our quality  
20  
21  
22 116 control criteria and were subjected to RNA sequencing.

23  
24 117  
25  
26 118 *RNA sequencing*

27  
28 119 RNA sequencing was conducted at the Genomics Core Facility of the EMBL, Heidelberg,  
29  
30  
31 120 Germany [RRID:SCR\_004473]. The cDNA library was generated using the non-stranded  
32  
33 121 NEBNext Ultra RNA Library Preparation Kit for Illumina (New England Biolabs, catalogue  
34  
35 122 #E7530), which includes oligo-dT bead selection of mRNA. For library enrichment, 13-14 PCR  
36  
37 123 cycles were performed. Pooled libraries were sequenced on the Illumina NextSeq 500 instrument  
38  
39 124 [RRID:SCR\_014983] in a 75bp paired-end mode using High output flow cells.

40  
41 125  
42  
43  
44 126 **Data validation and quality control**

45  
46 127 Sequencing read quality was assessed using FastQC (Babraham Bioinformatics)  
47  
48 128 [RRID:SCR\_014583], the results of which were merged using MultiQC (<http://multiqc.info>)  
49  
50 129 [RRID:SCR\_014982]. Results are displayed in **Figure 2**. Per base quality *phred* scores range  
51  
52 130 from 34.80 to 35.15, indicating base call accuracies of >99.9% (**Figure 2A**). Overall 91.48-94.03%  
53  
54 131 of reads had a mean *phred* score of 30 or above (**Figure 2B**). In line with these scores, per base  
55  
56 132 N content (i.e. percentage of bases that could not confidently called) was very low, with a  
57  
58 133 maximum value 0.053%.

1  
2  
3  
4 134  
5  
6 135  
7  
8 136  
9  
10  
11 137  
12  
13 138  
14  
15 139  
16  
17 140  
18  
19 141  
20  
21 142  
22  
23 143  
24  
25 144  
26  
27 145  
28  
29 146  
30  
31 147  
32  
33 148  
34  
35 149  
36  
37 150  
38  
39 151  
40  
41 152  
42  
43 153  
44  
45 154  
46  
47 155  
48  
49 156  
50  
51 157  
52  
53 158  
54  
55 159  
56  
57  
58  
59  
60  
61  
62  
63  
64  
65

*Figure 2 is about here*

Reads were then mapped to the mm10 reference genome using STAR [5] [RRID:SCR\_005622], which uniquely mapped between 39,000,000 and 59,000,000 reads, constituting an average 90.15% unique map rate across samples (**Figure 2D**). Since the library preparation protocol entails a PCR enrichment step, which can lead to technical duplication and hence an overestimation of observed transcripts, we used Seqmonk (Babraham Bioinformatics) [RRID:SCR\_001913] to plot the read density against the duplication levels (i.e. the percentage of duplicate reads) for each transcript. The obtained duplication plots showed a clear positive relation between read density and duplication levels (**Figure 3** and **Supplemental Figure 1**), suggesting that the origin of read duplication is biological, rather than technical. Based on the above quality control measures we determined that our RNA-sequencing data was of sufficient quality to be used in downstream analyses, therefore we continued with gene expression analysis.

*Figure 3 is about here*

### *Analysis of gene expression*

Using a 2 read cut-off we identified 16,900 to 17,600 transcripts per sample (**Figure 4A**). Raw gene counts can be found online (see Supporting Data – DOI to appear). Differential gene expression analyses across groups were performed using EdgeR v3.12.1 [6, 7] [RRID:SCR\_012802] using only genes with a count per million (CPM) >1 in at least 4 samples (**Supplementary Table 1** for details on the commands used). Since laminar identity is an important feature of our experimental setup, we assessed the relative expression of known

1  
2  
3  
4 160 molecular markers for L2/3 (*Cacna1h*, *Id2*, *Igfbp4*, *Igfn1*, *Mdga1*, *Plcx1*, *Rasgrf2*, *Rgs8*, *Tle3*)  
5  
6 161 and L4 (*Cartpt*, *Cyp39a1*, *Kcnh5*, *Kcnip2*, *Lmo3*, *Rorb*, *Scnn1a*) [8–10], which showed selective  
7  
8 162 enrichment of the laminar markers in isolated layers (**Figure 4B**).

10  
11 163  
12  
13 164 *Figure 4 is about here*

14  
15 165  
16  
17 166 To assess the variance in transcript counts, we calculated the coefficient of variation (CV) for  
18  
19 167 each transcript with a cut-off of 50 as the minimal read count separately for each group (**Figure**  
20  
21 168 **4C**). This analysis showed that, on average, 85.93% of transcripts have a CV below 15%,  
22  
23 169 suggesting low variance across transcript counts for individual genes. Principal component  
24  
25 170 analysis (PCA) showed that samples cluster based on layer, and the first two components  
26  
27 171 explained ~88% variance the data (**Figure 4C, Supplemental Figure 2B**).

28  
29 172  
30  
31 173 These quality control routines suggest that we have obtained RNA-sequencing data of high read  
32  
33 174 quality, with individual bases being called confidently throughout the length of reads, which  
34  
35 175 uniquely map to the mm10 reference genome at high rates (>90% average). The laminar origin  
36  
37 176 of our samples could be identified through known molecular markers, confirming our samples are  
38  
39 177 of high anatomical specificity.  
40  
41  
42  
43

#### 44 178 45 46 179 **Re-use potential**

47  
48  
49 180 The current RNA-seq dataset might help address the molecular underpinnings of cortical  
50  
51 181 experience-dependent plasticity. For example, it could be used (1) to identify genes whose  
52  
53 182 transcription is modulated in an experience-dependent manner, (2) to statistically map the  
54  
55 183 transcriptional networks at laminar resolution, (3) creating synergy with the single neuron RNA-  
56  
57 184 seq datasets [11, 12], to address the molecular diversity of the cortical networks, (4) combined  
58  
59 185 with the proteomic analysis performed under comparable experimental conditions in the  
60  
61  
62  
63  
64  
65

1  
2  
3  
4  
5  
6  
7  
8  
9  
10  
11  
12  
13  
14  
15  
16  
17  
18  
19  
20  
21  
22  
23  
24  
25  
26  
27  
28  
29  
30  
31  
32  
33  
34  
35  
36  
37  
38  
39  
40  
41  
42  
43  
44  
45  
46  
47  
48  
49  
50  
51  
52  
53  
54  
55  
56  
57  
58  
59  
60  
61  
62  
63  
64  
65

186 accompanying manuscript (Kole et al, submitted), to systematically study the transcriptional and  
187 translational regulation of the genome upon altered sensory experience, and finally (5) to identify  
188 and quantify splice isoforms, given the sequencing depth of the current dataset. Since splicing  
189 and other posttranscriptional mechanisms govern which proteins are ultimately produced,  
190 combining the current transcriptomic dataset with a proteomics approach would also be of high  
191 importance.

192  
193 The current dataset focuses on isolated cortical columns and layers, which are necessarily  
194 diverse samples containing neuronal and non-neuronal cell classes. In terms of experience  
195 dependent plasticity, although most previous studies focus on excitatory projections, inhibitory  
196 cells and even non-neuronal cells have been implicated in plasticity [13–15]. This heterogeneity  
197 might be particularly important for L2/3, as also shown by the principal component analysis  
198 (**Figure 4D**), given the relative diversity of cellular populations in supragranular layers and their  
199 heterogeneous connectivity patterns [16].

200  
201 Researchers reusing our dataset should be aware that comparisons between control column C  
202 and spared columns (A/E, B/D) may have to be approached with caution, as this would involve  
203 two different columnar identities (whose transcriptomic dissimilarities are currently unknown),  
204 each coming from cortices that have had different sensory experience. However direct  
205 comparisons between the C columns across experimental conditions (i.e control versus deprived)  
206 as well as within-animal across-column comparisons in deprived animals control for these  
207 confounding variables.

208  
209 Taken together we hope that this data will prove useful in discovering novel molecular targets  
210 responsible for cortical plasticity and will lead to targeted control of plasticity in health and disease.

211



## References

1. Hand PJ (1892) Plasticity of the rat cortical barrel system. In: Strick P, Morrison AD (eds) *Changing concepts of the nervous system*. Academic Press, New York, pp 49–75
2. Allen CB, Celikel T, Feldman DE (2003) Long-term depression induced by sensory deprivation during cortical map plasticity in vivo. *Nat Neurosci* 6:291–9. doi: 10.1038/nn1012
3. Celikel T, Szostak VA, Feldman DE (2004) Modulation of spike timing by sensory deprivation during induction of cortical map plasticity. *Nat Neurosci* 7:534–41. doi: 10.1038/nn1222
4. Clem RL, Celikel T, Barth AL (2008) Ongoing in vivo experience triggers synaptic metaplasticity in the neocortex. *Science* 319:101–4. doi: 10.1126/science.1143808
5. Dobin A, Davis CA, Schlesinger F, Drenkow J, Zaleski C, Jha S, Batut P, Chaisson M, Gingeras TR (2013) STAR: ultrafast universal RNA-seq aligner. *Bioinformatics* 29:15. doi: 10.1093/bioinformatics/bts635
6. Robinson MD, McCarthy DJ, Smyth GK (2010) edgeR: a Bioconductor package for differential expression analysis of digital gene expression data. *Bioinformatics* 26:139. doi: 10.1093/bioinformatics/btp616
7. McCarthy DJ, Chen Y, Smyth GK (2012) Differential expression analysis of multifactor RNA-Seq experiments with respect to biological variation. *Nucleic Acids Res* 40:4288. doi: 10.1093/nar/gks042
8. Molyneaux BJ, Goff LA, Rinn JL, Arlotta P (2015) Genome-wide Analysis of In Vivo Transcriptional Dynamics during Pyramidal Neuron Fate Selection in Neocortex *NeuroResource DeCoN: Genome-wide Analysis of In Vivo Transcriptional Dynamics during Pyramidal Neuron Fate Selection in Neocortex*. 275–288.
9. Xue M, Atallah B V., Scanziani M (2014) Equalizing excitation–inhibition ratios across visual cortical neurons. *Nature* 511:596–600. doi: 10.1038/nature13321
10. Rowell JJ, Mallik AK, Dugas-Ford J, Ragsdale CW (2010) Molecular analysis of neocortical layer structure in the ferret. *J Comp Neurol* 518:3272–3289. doi: 10.1002/cne.22399
11. Zeisel A, Munoz-Manchado AB, Codeluppi S, Lonnerberg P, La Manno G, Jureus A, Marques S, Munguba H, He L, Betsholtz C, Rolny C, Castelo-Branco G, Hjerling-Leffler J, Linnarsson S (2015) Cell types in the mouse cortex and hippocampus revealed by single-cell RNA-seq. *Science* (80- ) 347:1138–1142. doi: 10.1126/science.aaa1934
12. Tasic B, Menon V, Nguyen TN, Kim TK, Jarsky T, Yao Z, Levi B, Gray LT, Sorensen SA, Dolbeare T, Bertagnolli D, Goldy J, Shapovalova N, Parry S, Lee C, Smith K, Bernard A, Madisen L, Sunkin SM, Hawrylycz M, Koch C, Zeng H (2016) Adult mouse cortical cell taxonomy revealed by single cell transcriptomics. *Nat Neurosci* 19:335–346. doi: 10.1038/nn.4216
13. Tropea D, Van Wart A, Sur M (2009) Molecular mechanisms of experience-dependent plasticity in visual cortex. *Philos Trans R Soc Lond B Biol Sci* 364:341–55. doi: 10.1098/rstb.2008.0269
14. Kole K (2015) Experience-dependent plasticity of neurovascularization. *J Neurophysiol* 114:2077–9. doi: 10.1152/jn.00972.2014
15. Foeller E, Celikel T, Feldman DE (2005) Inhibitory sharpening of receptive fields contributes to whisker map plasticity in rat somatosensory cortex. *J Neurophysiol* 94:4387–400. doi: 10.1152/jn.00553.2005
16. Markram H, Muller E, Ramaswamy S, Reimann MW, Abdellah M, Sanchez CA, Ailamaki A, Alonso-Nanclares L, Antille N, Arsever S, Kahou GAA, Berger TK, Bilgili A, Buncic N, Chalimourda A, Chindemi G, Courcol J-D, Delalondre F, Delattre V, Druckmann S, Dumusc R, Dynes J, Eilemann S, Gal E, Gevaert ME, Ghobril J-P, Gidon A, Graham JW, Gupta A, Haenel V, Hay E, Heinis T, Hernando JB, Hines M, Kanari L, Keller D, Kenyon

1  
2  
3  
4  
5  
6  
7  
8  
9  
10  
11  
12  
13  
14  
15  
16  
17  
18  
19  
20  
21  
22  
23  
24  
25  
26  
27  
28  
29  
30  
31  
32  
33  
34  
35  
36  
37  
38  
39  
40  
41  
42  
43  
44  
45  
46  
47  
48  
49  
50  
51  
52  
53  
54  
55  
56  
57  
58  
59  
60  
61  
62  
63  
64  
65

263 J, Khazen G, Kim Y, King JG, Kisvarday Z, Kumbhar P, Lasserre S, Le Bé J-V,  
264 Magalhães BRC, Merchán-Pérez A, Meystre J, Morrice BR, Muller J, Muñoz-Céspedes  
265 A, Muralidhar S, Muthurasa K, Nachbaur D, Newton TH, Nolte M, Ovcharenko A,  
266 Palacios J, Pastor L, Perin R, Ranjan R, Riachi I, Rodríguez J-R, Riquelme JL, Rössert  
267 C, Sfyraakis K, Shi Y, Shillcock JC, Silberberg G, Silva R, Tauheed F, Telefont M, Toledo-  
268 Rodriguez M, Tränkler T, Van Geit W, Díaz JV, Walker R, Wang Y, Zaninetta SM,  
269 DeFelipe J, Hill SL, Segev I, Schürmann F (2015) Reconstruction and Simulation of  
270 Neocortical Microcircuitry. *Cell* 163:456–492. doi: 10.1016/j.cell.2015.09.029  
271

1  
2  
3  
4  
5  
6  
7  
8  
9  
10  
11  
12  
13  
14  
15  
16  
17  
18  
19  
20  
21  
22  
23  
24  
25  
26  
27  
28  
29  
30  
31  
32  
33  
34  
35  
36  
37  
38  
39  
40  
41  
42  
43  
44  
45  
46  
47  
48  
49  
50  
51  
52  
53  
54  
55  
56  
57  
58  
59  
60  
61  
62  
63  
64  
65

**272 Availability of the supporting data**

273 Supporting data are available online (<https://goo.gl/tBof51>) and will be distributed via GigaScience  
274 DB.

275 Raw sequence reads were deposited in NCBI GEO.

276 Link: <https://www.ncbi.nlm.nih.gov/geo/query/acc.cgi?acc=GSE90929>

**278 List of abbreviations**

279 EDP Experience dependent plasticity

280 L2/3 Cortical Layer 2/3, also known as supragranular layers

281 L4 Cortical Layer 4, i.e. granular layer

**283 Competing interests**

284 The authors declare no competing interests.

**286 Author contributions**

287 KK performed all experimental manipulations, sample acquisition, biological and bioinformatic  
288 quality controls, and prepared the tables and figures. YK and JaP performed bioinformatic  
289 analysis. JeP performed library prep. VB supervised RNA-seq. PT contributed bioinformatic  
290 analysis and co-supervised the project. TC designed and supervised the project. KK and TC wrote  
291 the manuscript. All authors edited otherwise approved the final version of the manuscript.

1  
2  
3  
4 **292 Figure Legends**

5 **293**  
6 **294** **Figure 1.** Overview of the experimental design, sample collection and data organization. **(A)** Pups  
7 **295** were bilaterally spared or deprived of off their C-row whiskers between P12 and P23-P24, when  
8 **296** acute slices are made and column- and layer-specific tissues were excised. **(B)** RNA was isolated,  
9 **297** checked for integrity and purity, and subsequently sequenced. **(C)** Organization of the database.  
10 **298** Colour codes denote experimental groups. Same denominations are used in the read counts  
11 **299** matrix file (see **Supplemental Data**).  
12  
13  
14

15 **300**  
16 **301** **Figure 2.** FastQC and STAR output graphs for all samples. **(A-B)** *Phred* scores per base and  
17 **302** per sequence. **(C)** Per sequence GC content. **(D)** STAR output of alignment scores.  
18 **303**

19 **304** **Figure 3.** Overlays of duplication plot contours, showing a positive correlation between read  
20 **305** density and duplication levels. Depicted contours enclose 90% of the data points.  
21 **306**

22 **307** **Figure 4.** Gene expression analyses. **(A)** Histogram of read counts per transcript per sample.  
23 **308** With a cut-off of 2 reads, between 16,900 and 17,600 transcripts could be identified across  
24 **309** samples. **(B)** Relative expression of known molecular markers for cortical laminae. Layer 4  
25 **310** markers are enriched in samples originating from this layer; the same is true for Layer 2/3 marker  
26 **311** expression in Layer 2/3 samples. **(C)** Cumulative plots of the coefficient of variance (CV) of  
27 **312** individual experimental groups. Including only transcripts identified by 50 reads or more, average  
28 **313** CVs of <15% are found in ~85% of transcripts. **(D)** Principal component analysis (PCA) showing  
29 **314** sample clustering by layer, including only transcripts identified by at least 50 reads. Principal  
30 **315** component (PC) 1 and 2 account for 88% of overall variance.  
31 **316**

32 **317** **Supplemental Figure 1.** Duplication plots for all samples, produced using SeqMonk (Babraham  
33 **318** Bioinformatics).  
34 **319**

35 **320** **Supplemental Figure 2.** **(A)** Cumulative plots of the coefficient of variance (CV) of experimental  
36 **321** each group, including transcripts identified by at least one read. Average CVs of <25% are  
37 **322** found in ~85% of transcripts. **(B)** Principal component analysis (PCA) including transcripts  
38 **323** identified by at least one read. The majority (88%) of overall variance is explained by Principal  
39 **324** components (PC) 1 and 2.  
40  
41  
42  
43  
44  
45  
46  
47  
48  
49  
50  
51  
52  
53  
54  
55  
56  
57  
58  
59  
60  
61  
62  
63  
64  
65

# 1 2 3 4 1 **Transcriptional mapping of the primary somatosensory cortex upon sensory deprivation**

5  
6 2 Koen Kole<sup>1,2</sup>, Yutaro Komuro<sup>1</sup>, Jan Provaznik<sup>3</sup>, Jelena Pistolic<sup>3</sup>,

7  
8 3 Vladimir Benes<sup>3</sup>, Paul Tiesinga<sup>2</sup>, Tansu Celikel<sup>1</sup>

9  
10 4 (1) Department of Neurophysiology, (2) Department of Neuroinformatics, Donders Institute for  
11 5 Brain, Cognition, and Behaviour, Radboud University, Nijmegen - the Netherlands. (3) European  
12 6 Molecular Biology Laboratory (EMBL), Genomics Core Facility, Heidelberg - Germany

13  
14 7 E-mail addresses (in the order of appearance): [k.kole@neurophysiology.nl](mailto:k.kole@neurophysiology.nl),  
15 8 [y.komuro@neurophysiology.nl](mailto:y.komuro@neurophysiology.nl), [jan.provaznik@embl.de](mailto:jan.provaznik@embl.de), [jelena.pistollic@embl.de](mailto:jelena.pistollic@embl.de),  
16 9 [benes@embl.de](mailto:benes@embl.de), [p.tiesinga@science.ru.nl](mailto:p.tiesinga@science.ru.nl), [celikel@neurophysiology.nl](mailto:celikel@neurophysiology.nl) (corresponding author)

## 10 11 **Background (138)**

12 Experience-dependent plasticity (EDP) is essential for anatomical and functional maturation of  
13 13 sensory circuits during development. Although the principal synaptic and circuit mechanisms of  
14 14 EDP are increasingly well studied experimentally and computationally, its molecular mechanisms  
15 15 remain largely elusive. EDP can be readily studied in the rodent barrel cortex, where each 'barrel  
16 16 column' preferentially represents deflections of its own principal whisker. Depriving select  
17 17 whiskers while sparing their neighbours introduces competition between barrel columns,  
18 18 ultimately leading to weakening of intracortical, translaminal (i.e. Cortical Layer (L)4-to-L2/3) feed-  
19 19 forward excitatory projections in the deprived columns. The same synapses are potentiated in the  
20 20 neighbouring spared columns. These experience-dependent alterations of synaptic strength are  
21 21 thought to underlie somatosensory map plasticity. We used RNA sequencing in this model system  
22 22 to uncover cortical-column and -layer specific changes on the transcriptome level that are induced  
23 23 by altered sensory experience.

## 24 **Findings (66)**

25 Column- and layer-specific barrel cortical tissues were collected from juvenile mice with all  
26 26 whiskers intact and mice that received 11-12 days long whisker (C-row) deprivation before high  
27 27 quality RNA was purified and sequenced. The current dataset entails an average of 50 million  
28 28 paired-end reads per sample, 75 base pairs in length. On average, 90.15% of reads could be  
29 29 uniquely mapped to the mm10 reference mouse genome.

## 30 **Conclusions (32) – Word total for the abstract: 246 out of 250**

31 The current data reveal the transcriptional changes in gene expression in the barrel cortex upon  
32 32 altered sensory experience in juvenile mice and will help to molecularly map the mechanisms of  
33 33 cortical plasticity.

1  
2  
3  
4  
5  
6  
7  
8  
9  
10  
11  
12  
13  
14  
15  
16  
17  
18  
19  
20  
21  
22  
23  
24  
25  
26  
27  
28  
29  
30  
31  
32  
33  
34  
35  
36  
37  
38  
39  
40  
41  
42  
43  
44  
45  
46  
47  
48  
49  
50  
51  
52  
53  
54  
55  
56  
57  
58  
59  
60  
61  
62  
63  
64  
65

1  
2  
3  
4  
5  
6  
7  
8  
9  
10  
11  
12  
13  
14  
15  
16  
17  
18  
19  
20  
21  
22  
23  
24  
25  
26  
27  
28  
29  
30  
31  
32  
33  
34  
35  
36  
37  
38  
39  
40  
41  
42  
43  
44  
45  
46  
47  
48  
49  
50  
51  
52  
53  
54  
55  
56  
57  
58  
59  
60  
61  
62  
63  
64  
65

34 **Data Description**

35 **Context**

36 Sensory experience powerfully shapes neural circuits. Changes due to sensory organ deprivation  
37 such as eye closure, digit amputation, and whisker trimming provide powerful means for studying  
38 mechanisms of experience dependent cortical plasticity.

39 In the whisker system experience dependent plasticity is most commonly studied in the  
40 barrel cortex subfield of the primary somatosensory cortex where neural representations of  
41 whiskers change in response to altered patterns of incoming sensory information. As originally  
42 shown in the barrel cortex [1] sensory deprivation induced by transient whisker trimming is  
43 sufficient to perturb neural receptive fields both during development and in adulthood. Previous  
44 work has also shown that the cellular basis of deprivation-induced decreases in whisker evoked  
45 representations are primarily due to a reduction of synaptic strength in monosynaptically  
46 connected feed-forward neuronal networks in behaving animals [2, 3]. Conversely whisker  
47 sparing induced enhancement in whisker representation is mediated at least in part by the long-  
48 term synaptic facilitation expressed along the L4 projections *in vivo* [4]. Identification of the  
49 molecular events that mediate these bidirectional changes in synaptic connectivity will benefit  
50 from systematic analysis of the gene transcription. Therefore, we performed RNA sequencing in  
51 the barrel cortex with or without sensory deprivation across cortical layers 2-4. This database will  
52 assist molecular and cellular neurobiologists in addressing the molecular mechanisms associated  
53 with experience dependent plasticity, and will enable statistical approaches to determine the  
54 dynamics of the coupled changes across molecular pathways as cortical circuits undergo plastic  
55 changes in their organization.

56

1  
2  
3  
4 **Methods**

5  
6 *Animals*

7  
8  
9 All experiments were performed in accordance with the Animal Ethics Committee of the Radboud  
10 University in Nijmegen, the Netherlands. Pregnant wild type mice (Charles River, [stock number](#)  
11 [000664](#)) [[RRID:NCBITaxon\\_10090](#)]- were kept at a 12-hour light/dark cycle with access to food  
12  
13 *ad libitum*. Cages were checked for birth daily. To induce experience-dependent plasticity, pups  
14  
15  
16  
17  
18  
19  
20  
21  
22  
23  
24  
25  
26  
27  
28  
29  
30  
31  
32  
33  
34  
35  
36  
37  
38  
39  
40  
41  
42  
43  
44  
45  
46  
47  
48  
49  
50  
51  
52  
53  
54  
55  
56  
57  
58  
59  
60  
61  
62  
63  
64  
65  
66  
67  
68  
69  
70  
71  
72  
73  
74  
75  
76  
77  
78  
79  
80  
81  
82  
83  
84  
85  
86  
87  
88  
89  
90  
91  
92  
93  
94  
95  
96  
97  
98  
99  
100  
101  
102  
103  
104  
105  
106  
107  
108  
109  
110  
111  
112  
113  
114  
115  
116  
117  
118  
119  
120  
121  
122  
123  
124  
125  
126  
127  
128  
129  
130  
131  
132  
133  
134  
135  
136  
137  
138  
139  
140  
141  
142  
143  
144  
145  
146  
147  
148  
149  
150  
151  
152  
153  
154  
155  
156  
157  
158  
159  
160  
161  
162  
163  
164  
165  
166  
167  
168  
169  
170  
171  
172  
173  
174  
175  
176  
177  
178  
179  
180  
181  
182  
183  
184  
185  
186  
187  
188  
189  
190  
191  
192  
193  
194  
195  
196  
197  
198  
199  
200  
201  
202  
203  
204  
205  
206  
207  
208  
209  
210  
211  
212  
213  
214  
215  
216  
217  
218  
219  
220  
221  
222  
223  
224  
225  
226  
227  
228  
229  
230  
231  
232  
233  
234  
235  
236  
237  
238  
239  
240  
241  
242  
243  
244  
245  
246  
247  
248  
249  
250  
251  
252  
253  
254  
255  
256  
257  
258  
259  
260  
261  
262  
263  
264  
265  
266  
267  
268  
269  
270  
271  
272  
273  
274  
275  
276  
277  
278  
279  
280  
281  
282  
283  
284  
285  
286  
287  
288  
289  
290  
291  
292  
293  
294  
295  
296  
297  
298  
299  
300  
301  
302  
303  
304  
305  
306  
307  
308  
309  
310  
311  
312  
313  
314  
315  
316  
317  
318  
319  
320  
321  
322  
323  
324  
325  
326  
327  
328  
329  
330  
331  
332  
333  
334  
335  
336  
337  
338  
339  
340  
341  
342  
343  
344  
345  
346  
347  
348  
349  
350  
351  
352  
353  
354  
355  
356  
357  
358  
359  
360  
361  
362  
363  
364  
365  
366  
367  
368  
369  
370  
371  
372  
373  
374  
375  
376  
377  
378  
379  
380  
381  
382  
383  
384  
385  
386  
387  
388  
389  
390  
391  
392  
393  
394  
395  
396  
397  
398  
399  
400  
401  
402  
403  
404  
405  
406  
407  
408  
409  
410  
411  
412  
413  
414  
415  
416  
417  
418  
419  
420  
421  
422  
423  
424  
425  
426  
427  
428  
429  
430  
431  
432  
433  
434  
435  
436  
437  
438  
439  
440  
441  
442  
443  
444  
445  
446  
447  
448  
449  
450  
451  
452  
453  
454  
455  
456  
457  
458  
459  
460  
461  
462  
463  
464  
465  
466  
467  
468  
469  
470  
471  
472  
473  
474  
475  
476  
477  
478  
479  
480  
481  
482  
483  
484  
485  
486  
487  
488  
489  
490  
491  
492  
493  
494  
495  
496  
497  
498  
499  
500  
501  
502  
503  
504  
505  
506  
507  
508  
509  
510  
511  
512  
513  
514  
515  
516  
517  
518  
519  
520  
521  
522  
523  
524  
525  
526  
527  
528  
529  
530  
531  
532  
533  
534  
535  
536  
537  
538  
539  
540  
541  
542  
543  
544  
545  
546  
547  
548  
549  
550  
551  
552  
553  
554  
555  
556  
557  
558  
559  
560  
561  
562  
563  
564  
565  
566  
567  
568  
569  
570  
571  
572  
573  
574  
575  
576  
577  
578  
579  
580  
581  
582  
583  
584  
585  
586  
587  
588  
589  
590  
591  
592  
593  
594  
595  
596  
597  
598  
599  
600  
601  
602  
603  
604  
605  
606  
607  
608  
609  
610  
611  
612  
613  
614  
615  
616  
617  
618  
619  
620  
621  
622  
623  
624  
625  
626  
627  
628  
629  
630  
631  
632  
633  
634  
635  
636  
637  
638  
639  
640  
641  
642  
643  
644  
645  
646  
647  
648  
649  
650  
651  
652  
653  
654  
655  
656  
657  
658  
659  
660  
661  
662  
663  
664  
665  
666  
667  
668  
669  
670  
671  
672  
673  
674  
675  
676  
677  
678  
679  
680  
681  
682  
683  
684  
685  
686  
687  
688  
689  
690  
691  
692  
693  
694  
695  
696  
697  
698  
699  
700  
701  
702  
703  
704  
705  
706  
707  
708  
709  
710  
711  
712  
713  
714  
715  
716  
717  
718  
719  
720  
721  
722  
723  
724  
725  
726  
727  
728  
729  
730  
731  
732  
733  
734  
735  
736  
737  
738  
739  
740  
741  
742  
743  
744  
745  
746  
747  
748  
749  
750  
751  
752  
753  
754  
755  
756  
757  
758  
759  
760  
761  
762  
763  
764  
765  
766  
767  
768  
769  
770  
771  
772  
773  
774  
775  
776  
777  
778  
779  
780  
781  
782  
783  
784  
785  
786  
787  
788  
789  
790  
791  
792  
793  
794  
795  
796  
797  
798  
799  
800  
801  
802  
803  
804  
805  
806  
807  
808  
809  
810  
811  
812  
813  
814  
815  
816  
817  
818  
819  
820  
821  
822  
823  
824  
825  
826  
827  
828  
829  
830  
831  
832  
833  
834  
835  
836  
837  
838  
839  
840  
841  
842  
843  
844  
845  
846  
847  
848  
849  
850  
851  
852  
853  
854  
855  
856  
857  
858  
859  
860  
861  
862  
863  
864  
865  
866  
867  
868  
869  
870  
871  
872  
873  
874  
875  
876  
877  
878  
879  
880  
881  
882  
883  
884  
885  
886  
887  
888  
889  
890  
891  
892  
893  
894  
895  
896  
897  
898  
899  
900  
901  
902  
903  
904  
905  
906  
907  
908  
909  
910  
911  
912  
913  
914  
915  
916  
917  
918  
919  
920  
921  
922  
923  
924  
925  
926  
927  
928  
929  
930  
931  
932  
933  
934  
935  
936  
937  
938  
939  
940  
941  
942  
943  
944  
945  
946  
947  
948  
949  
950  
951  
952  
953  
954  
955  
956  
957  
958  
959  
960  
961  
962  
963  
964  
965  
966  
967  
968  
969  
970  
971  
972  
973  
974  
975  
976  
977  
978  
979  
980  
981  
982  
983  
984  
985  
986  
987  
988  
989  
990  
991  
992  
993  
994  
995  
996  
997  
998  
999  
1000

*Figure 1 is about here*

75 *Slice preparation and sample collection*

76 Pups were anaesthetized using isoflurane and then perfused with ice-cold carbogenated slicing  
77 medium (108 mM ChCl, 3 mM KCl, 26 mM NaHCO<sub>3</sub>, 1.25 mM NaH<sub>2</sub>PO<sub>4</sub>, 25 mM glucose, 1 mM  
78 CaCl<sub>2</sub>, 6 mM MgSO<sub>4</sub> and 3 mM Na-pyruvate). Next, pups were decapitated before the brain was  
79 quickly dissected out and 400 µm thalamocortical slices from each hemisphere were prepared as  
80 described before [2, 3]. Slices were transferred to 37 degrees Celsius carbogenated ACSF (120  
81 mM NaCl, 3.5 mM KCl, 10 mM glucose, 2.5 mM CaCl<sub>2</sub>, 1.3 mM MgSO<sub>4</sub>, 25 mM NaHCO<sub>3</sub> and 1.25

1  
2  
3  
4 82 mM NaH<sub>2</sub>PO<sub>4</sub>) where they were kept for 30 minutes and recovered at room temperature for  
5  
6 83 another 30 minutes until tissue collection.

7  
8  
9 84

10 85 After incubation, slices were placed under a Nikon Eclipse FN1 microscope. The holding chamber  
11  
12  
13 86 was continuously perfused with room temperature carbogenated ACSF. Due to the 55 degree  
14  
15 87 cut, slices were obtained in which S1 barrels from specific rows (A-E) could be identified [2]. A  
16  
17 88 thin, long glass pipette was pulled using a Sutter instruments P-2000 pipette puller and was used  
18  
19  
20 89 to make intercolumnar incisions from L1 to the bottom of L4 after which the slice was placed under  
21  
22 90 a binocular dissection microscope where the location of specific barrel columns could now be  
23  
24 91 readily identified by eye. A sterile 32G needle was then used to cut out L2/3 and L4 separately  
25  
26 92 from each column. Tissue from columns A/E and B/D were pooled as they both constitute second  
27  
28 93 and first order spared whiskers, respectively. Immediately after dissection, tissue samples were  
29  
30 94 snap frozen in liquid nitrogen and stored at -80 degrees Celsius until further use. All tools that  
31  
32  
33 95 came into direct contact with brain tissue were treated using RNaseZap in order to minimize  
34  
35 96 RNase contamination.

36  
37  
38 97

#### 39 40 98 *RNA isolation and quality control*

41  
42 99 Tissue samples originating from the same rows and layers were pooled within each animal. From  
43  
44 100 control animals, only the C column tissues were used (also see *Re-use potential*). Tissue was  
45  
46 101 quickly dissolved in Qiazol (Qiagen #79306), after which RNA was isolated using the miRNeasy  
47  
48 102 Mini kit (Qiagen #217004), DNase treated (Thermo Scientific, #EN0521) and cleaned up using  
49  
50 103 RNeasy MinElute kit (Qiagen #74204), all following the manufacturer's instructions. Samples were  
51  
52  
53 104 then stored at -80 degrees Celsius until further processing.

54  
55  
56 105

57  
58 106 RNA sample integrity was determined using Agilent TapeStation (High Sensitivity RNA  
59  
60 107 Screentape). Sample RINs ranged from 7.1 to 8.8. To further assess RNA purity and integrity,

61  
62  
63  
64  
65



1  
2  
3  
4 108 RNA samples were used in RT-PCR to confirm that cDNA could be produced and that a large  
5  
6 109 (~1000 bp) amplicon could be obtained. To produce cDNA, SuperScript® II Reverse  
7  
8 110 Transcriptase (Thermo Scientific #18064014) and random hexamer primers (Roche  
9  
10 111 #11034731001) were used. The resulting cDNA was then added to a PCR reaction mix which  
11  
12 112 further consisted of Jumpstart Ready Mix (Sigma P2893) and exon-exon junction spanning  
13  
14 113 CamKII primers (FW TCCAACATTGTACGCCTCCAT; RV TGTTGGTGCTGTCGGAAGAT).  
15  
16 114 From all cDNA samples a fragment of the expected size could be amplified, suggesting that the  
17  
18 115 RNA samples contained pure RNA of sufficient integrity. All RNA samples thus passed our quality  
19  
20 116 control criteria and were subjected to RNA sequencing.  
21  
22  
23

24 117

#### 25 26 118 *RNA sequencing*

27  
28 119 RNA sequencing was conducted at the Genomics Core Facility of the EMBL, Heidelberg,  
29  
30 120 Germany [\[RRID:SCR\\_004473\]](#). The cDNA library was generated using the non-stranded  
31  
32 121 NEBNext Ultra RNA Library Preparation Kit for Illumina (New England Biolabs, catalogue  
33  
34 122 #E7530), which includes oligo-dT bead selection of mRNA. For library enrichment, 13-14 PCR  
35  
36 123 cycles were performed. Pooled libraries were sequenced on the Illumina NextSeq 500 instrument  
37  
38 124 [\[RRID:SCR\\_014983\]](#) in a 75bp paired-end mode using High output flow cells.  
39  
40  
41

42 125

#### 43 44 126 **Data validation and quality control**

45  
46 127 Sequencing read quality was assessed using FastQC (Babraham Bioinformatics)  
47  
48 128 [\[RRID:SCR\\_014583\]](#), the results of which were merged using MultiQC (<http://multiqc.info>)  
49  
50 129 [\[RRID:SCR\\_014982\]](#). Results are displayed in **Figure 2**. Per base quality *phred* scores range  
51  
52 130 from 34.80 to 35.15, indicating base call accuracies of >99.9% (**Figure 2A**). Overall 91.48-94.03%  
53  
54 131 of reads had a mean *phred* score of 30 or above (**Figure 2B**). In line with these scores, per base  
55  
56 132 N content (i.e. percentage of bases that could not confidently called) was very low, with a  
57  
58 133 maximum value 0.053%.  
59  
60  
61  
62  
63  
64  
65

1  
2  
3  
4 134  
5  
6 135  
7  
8  
9 136  
10  
11 137  
12  
13 138  
14  
15 139  
16  
17 140  
18  
19 141  
20  
21 142  
22  
23 143  
24  
25 144  
26  
27 145  
28  
29 146  
30  
31 147  
32  
33 148  
34  
35 149  
36  
37 150  
38  
39 151  
40  
41 152  
42  
43 153  
44  
45 154  
46  
47 155  
48  
49 156  
50  
51 157  
52  
53 158  
54  
55 159  
56  
57  
58  
59  
60  
61  
62  
63  
64  
65

*Figure 2 is about here*

Reads were then mapped to the mm10 reference genome using STAR [5] [\[RRID:SCR\\_005622\]](#), which uniquely mapped between 39,000,000 and 59,000,000 reads, constituting an average 90.15% unique map rate across samples (**Figure 2D**). Since the library preparation protocol entails a PCR enrichment step, which can lead to technical duplication and hence an overestimation of observed transcripts, we used Seqmonk (Babraham Bioinformatics) [\[RRID:SCR\\_001913\]](#) to plot the read density against the duplication levels (i.e. the percentage of duplicate reads) for each transcript. The obtained duplication plots showed a clear positive relation between read density and duplication levels (**Figure 3** and **Supplemental Figure 1**), suggesting that the origin of read duplication is biological, rather than technical. Based on the above quality control measures we determined that our RNA-sequencing data was of sufficient quality to be used in downstream analyses, therefore we continued with gene expression analysis.

*Figure 3 is about here*

### *Analysis of gene expression*

Using a 2 read cut-off we identified 16,900 to 17,600 transcripts per sample (**Figure 4A**). Raw gene counts can be found online (see Supporting Data – DOI to appear). Differential gene expression analyses across groups were performed using EdgeR v3.12.1 [6, 7] [\[RRID:SCR\\_012802\]](#) using only genes with a count per million (CPM) >1 in at least 4 samples (**Supplementary Table 1** for details on the commands used). Since laminar identity is an important feature of our experimental setup, we assessed the relative expression of known

1  
2  
3  
4 160 molecular markers for L2/3 (*Cacna1h*, *Id2*, *Igfbp4*, *Igfn1*, *Mdga1*, *Plcx1*, *Rasgrf2*, *Rgs8*, *Tle3*)  
5  
6 161 and L4 (*Cartpt*, *Cyp39a1*, *Kcnh5*, *Kcnip2*, *Lmo3*, *Rorb*, *Scnn1a*) [8–10], which showed selective  
7  
8 162 enrichment of the laminar markers in isolated layers (**Figure 4B**).

10  
11 163  
12  
13 164 *Figure 4 is about here*

14  
15 165  
16  
17 166 To assess the variance in transcript counts, we calculated the coefficient of variation (CV) for  
18  
19 167 each transcript with a cut-off of 50 as the minimal read count separately for each group (**Figure**  
20  
21 168 **4C**). This analysis showed that, on average, 85.93% of transcripts have a CV below 15%,  
22  
23 169 suggesting low variance across transcript counts for individual genes. Principal component  
24  
25 170 analysis (PCA) showed that samples cluster based on layer, and the first two components  
26  
27 171 explained ~88% variance the data (**Figure 4C, Supplemental Figure 2B**).

28  
29 172  
30  
31 173 These quality control routines suggest that we have obtained RNA-sequencing data of high read  
32  
33 174 quality, with individual bases being called confidently throughout the length of reads, which  
34  
35 175 uniquely map to the mm10 reference genome at high rates (>90% average). The laminar origin  
36  
37 176 of our samples could be identified through known molecular markers, confirming our samples are  
38  
39 177 of high anatomical specificity.  
40  
41  
42  
43

#### 44 178 45 46 179 **Re-use potential**

47  
48  
49 180 The current RNA-seq dataset might help address the molecular underpinnings of cortical  
50  
51 181 experience-dependent plasticity. For example, it could be used (1) to identify genes whose  
52  
53 182 transcription is modulated in an experience-dependent manner, (2) to statistically map the  
54  
55 183 transcriptional networks at laminar resolution, (3) creating synergy with the single neuron RNA-  
56  
57 184 seq datasets [11, 12], to address the molecular diversity of the cortical networks, (4) combined  
58  
59 185 with the proteomic analysis performed under comparable experimental conditions in the  
60  
61  
62  
63  
64  
65

1  
2  
3  
4  
5  
6  
7  
8  
9  
10  
11  
12  
13  
14  
15  
16  
17  
18  
19  
20  
21  
22  
23  
24  
25  
26  
27  
28  
29  
30  
31  
32  
33  
34  
35  
36  
37  
38  
39  
40  
41  
42  
43  
44  
45  
46  
47  
48  
49  
50  
51  
52  
53  
54  
55  
56  
57  
58  
59  
60  
61  
62  
63  
64  
65

186 accompanying manuscript (Kole et al, submitted), to systematically study the transcriptional and  
187 translational regulation of the genome upon altered sensory experience, and finally (5) to identify  
188 and quantify splice isoforms, given the sequencing depth of the current dataset. Since splicing  
189 and other posttranscriptional mechanisms govern which proteins are ultimately produced,  
190 combining the current transcriptomic dataset with a proteomics approach would also be of high  
191 importance.

192  
193 The current dataset focuses on isolated cortical columns and layers, which are necessarily  
194 diverse samples containing neuronal and non-neuronal cell classes. In terms of experience  
195 dependent plasticity, although most previous studies focus on excitatory projections, inhibitory  
196 cells and even non-neuronal cells have been implicated in plasticity [13–15]. This heterogeneity  
197 might be particularly important for L2/3, as also shown by the principal component analysis  
198 (**Figure 4D**), given the relative diversity of cellular populations in supragranular layers and their  
199 heterogeneous connectivity patterns [16].

200  
201 Researchers reusing our dataset should be aware that comparisons between control column C  
202 and spared columns (A/E, B/D) may have to be approached with caution, as this would involve  
203 two different columnar identities (whose transcriptomic dissimilarities are currently unknown),  
204 each coming from cortices that have had different sensory experience. However direct  
205 comparisons between the C columns across experimental conditions (i.e control versus deprived)  
206 as well as within-animal across-column comparisons in deprived animals control for these  
207 confounding variables.

208  
209 Taken together we hope that this data will prove useful in discovering novel molecular targets  
210 responsible for cortical plasticity and will lead to targeted control of plasticity in health and disease.

211

## References

1. Hand PJ (1892) Plasticity of the rat cortical barrel system. In: Strick P, Morrison AD (eds) *Changing concepts of the nervous system*. Academic Press, New York, pp 49–75
2. Allen CB, Celikel T, Feldman DE (2003) Long-term depression induced by sensory deprivation during cortical map plasticity in vivo. *Nat Neurosci* 6:291–9. doi: 10.1038/nn1012
3. Celikel T, Szostak VA, Feldman DE (2004) Modulation of spike timing by sensory deprivation during induction of cortical map plasticity. *Nat Neurosci* 7:534–41. doi: 10.1038/nn1222
4. Clem RL, Celikel T, Barth AL (2008) Ongoing in vivo experience triggers synaptic metaplasticity in the neocortex. *Science* 319:101–4. doi: 10.1126/science.1143808
5. Dobin A, Davis CA, Schlesinger F, Drenkow J, Zaleski C, Jha S, Batut P, Chaisson M, Gingeras TR (2013) STAR: ultrafast universal RNA-seq aligner. *Bioinformatics* 29:15. doi: 10.1093/bioinformatics/bts635
6. Robinson MD, McCarthy DJ, Smyth GK (2010) edgeR: a Bioconductor package for differential expression analysis of digital gene expression data. *Bioinformatics* 26:139. doi: 10.1093/bioinformatics/btp616
7. McCarthy DJ, Chen Y, Smyth GK (2012) Differential expression analysis of multifactor RNA-Seq experiments with respect to biological variation. *Nucleic Acids Res* 40:4288. doi: 10.1093/nar/gks042
8. Molyneaux BJ, Goff LA, Rinn JL, Arlotta P (2015) Genome-wide Analysis of In Vivo Transcriptional Dynamics during Pyramidal Neuron Fate Selection in Neocortex *NeuroResource DeCoN: Genome-wide Analysis of In Vivo Transcriptional Dynamics during Pyramidal Neuron Fate Selection in Neocortex*. 275–288.
9. Xue M, Atallah B V., Scanziani M (2014) Equalizing excitation–inhibition ratios across visual cortical neurons. *Nature* 511:596–600. doi: 10.1038/nature13321
10. Rowell JJ, Mallik AK, Dugas-Ford J, Ragsdale CW (2010) Molecular analysis of neocortical layer structure in the ferret. *J Comp Neurol* 518:3272–3289. doi: 10.1002/cne.22399
11. Zeisel A, Munoz-Manchado AB, Codeluppi S, Lonnerberg P, La Manno G, Jureus A, Marques S, Munguba H, He L, Betsholtz C, Rolny C, Castelo-Branco G, Hjerling-Leffler J, Linnarsson S (2015) Cell types in the mouse cortex and hippocampus revealed by single-cell RNA-seq. *Science* (80- ) 347:1138–1142. doi: 10.1126/science.aaa1934
12. Tasic B, Menon V, Nguyen TN, Kim TK, Jarsky T, Yao Z, Levi B, Gray LT, Sorensen SA, Dolbeare T, Bertagnolli D, Goldy J, Shapovalova N, Parry S, Lee C, Smith K, Bernard A, Madisen L, Sunkin SM, Hawrylycz M, Koch C, Zeng H (2016) Adult mouse cortical cell taxonomy revealed by single cell transcriptomics. *Nat Neurosci* 19:335–346. doi: 10.1038/nn.4216
13. Tropea D, Van Wart A, Sur M (2009) Molecular mechanisms of experience-dependent plasticity in visual cortex. *Philos Trans R Soc Lond B Biol Sci* 364:341–55. doi: 10.1098/rstb.2008.0269
14. Kole K (2015) Experience-dependent plasticity of neurovascularization. *J Neurophysiol* 114:2077–9. doi: 10.1152/jn.00972.2014
15. Foeller E, Celikel T, Feldman DE (2005) Inhibitory sharpening of receptive fields contributes to whisker map plasticity in rat somatosensory cortex. *J Neurophysiol* 94:4387–400. doi: 10.1152/jn.00553.2005
16. Markram H, Muller E, Ramaswamy S, Reimann MW, Abdellah M, Sanchez CA, Ailamaki A, Alonso-Nanclares L, Antille N, Arsever S, Kahou GAA, Berger TK, Bilgili A, Buncic N, Chalimourda A, Chindemi G, Courcol J-D, Delalondre F, Delattre V, Druckmann S, Dumusc R, Dynes J, Eilemann S, Gal E, Gevaert ME, Ghobril J-P, Gidon A, Graham JW, Gupta A, Haenel V, Hay E, Heinis T, Hernando JB, Hines M, Kanari L, Keller D, Kenyon

1  
2  
3  
4  
5  
6  
7  
8  
9  
10  
11  
12  
13  
14  
15  
16  
17  
18  
19  
20  
21  
22  
23  
24  
25  
26  
27  
28  
29  
30  
31  
32  
33  
34  
35  
36  
37  
38  
39  
40  
41  
42  
43  
44  
45  
46  
47  
48  
49  
50  
51  
52  
53  
54  
55  
56  
57  
58  
59  
60  
61  
62  
63  
64  
65

263 J, Khazen G, Kim Y, King JG, Kisvarday Z, Kumbhar P, Lasserre S, Le Bé J-V,  
264 Magalhães BRC, Merchán-Pérez A, Meystre J, Morrice BR, Muller J, Muñoz-Céspedes  
265 A, Muralidhar S, Muthurasa K, Nachbaur D, Newton TH, Nolte M, Ovcharenko A,  
266 Palacios J, Pastor L, Perin R, Ranjan R, Riachi I, Rodríguez J-R, Riquelme JL, Rössert  
267 C, Sfyarakis K, Shi Y, Shillcock JC, Silberberg G, Silva R, Tauheed F, Telefont M, Toledo-  
268 Rodriguez M, Tränkler T, Van Geit W, Díaz JV, Walker R, Wang Y, Zaninetta SM,  
269 DeFelipe J, Hill SL, Segev I, Schürmann F (2015) Reconstruction and Simulation of  
270 Neocortical Microcircuitry. *Cell* 163:456–492. doi: 10.1016/j.cell.2015.09.029  
271

1  
2  
3  
4  
5  
6  
7  
8  
9  
10  
11  
12  
13  
14  
15  
16  
17  
18  
19  
20  
21  
22  
23  
24  
25  
26  
27  
28  
29  
30  
31  
32  
33  
34  
35  
36  
37  
38  
39  
40  
41  
42  
43  
44  
45  
46  
47  
48  
49  
50  
51  
52  
53  
54  
55  
56  
57  
58  
59  
60  
61  
62  
63  
64  
65

**272 Availability of the supporting data**

273 Supporting data are available online (<https://goo.gl/tBof51>) and will be distributed via GigaScience  
274 DB.

275 Raw sequence reads were deposited in NCBI GEO.

276 Link: <https://www.ncbi.nlm.nih.gov/geo/query/acc.cgi?acc=GSE90929>

**278 List of abbreviations**

279 EDP Experience dependent plasticity

280 L2/3 Cortical Layer 2/3, also known as supragranular layers

281 L4 Cortical Layer 4, i.e. granular layer

**283 Competing interests**

284 The authors declare no competing interests.

**286 Author contributions**

287 KK performed all experimental manipulations, sample acquisition, biological and bioinformatic  
288 quality controls, and prepared the tables and figures. YK and JaP performed bioinformatic  
289 analysis. JeP performed library prep. VB supervised RNA-seq. PT contributed bioinformatic  
290 analysis and co-supervised the project. TC designed and supervised the project. KK and TC wrote  
291 the manuscript. All authors edited otherwise approved the final version of the manuscript.

1  
2  
3  
4 **292 Figure Legends**

5 **293**  
6 **294** **Figure 1.** Overview of the experimental design, sample collection and data organization. **(A)** Pups  
7 **295** were bilaterally spared or deprived of off their C-row whiskers between P12 and P23-P24, when  
8 **296** acute slices are made and column- and layer-specific tissues were excised. **(B)** RNA was isolated,  
9 **297** checked for integrity and purity, and subsequently sequenced. **(C)** Organization of the database.  
10 **298** Colour codes denote experimental groups. Same denominations are used in the read counts  
11 **299** matrix file (see **Supplemental Data**).  
12  
13  
14

15 **300**  
16 **301** **Figure 2.** FastQC and STAR output graphs for all samples. **(A-B)** *Phred* scores per base and  
17 **302** per sequence. **(C)** Per sequence GC content. **(D)** STAR output of alignment scores.  
18 **303**

19 **304** **Figure 3.** Overlays of duplication plot contours, showing a positive correlation between read  
20 **305** density and duplication levels. Depicted contours enclose 90% of the data points.  
21 **306**

22 **307** **Figure 4.** Gene expression analyses. **(A)** Histogram of read counts per transcript per sample.  
23 **308** With a cut-off of 2 reads, between 16,900 and 17,600 transcripts could be identified across  
24 **309** samples. **(B)** Relative expression of known molecular markers for cortical laminae. Layer 4  
25 **310** markers are enriched in samples originating from this layer; the same is true for Layer 2/3 marker  
26 **311** expression in Layer 2/3 samples. **(C)** Cumulative plots of the coefficient of variance (CV) of  
27 **312** individual experimental groups. Including only transcripts identified by 50 reads or more, average  
28 **313** CVs of <15% are found in ~85% of transcripts. **(D)** Principal component analysis (PCA) showing  
29 **314** sample clustering by layer, including only transcripts identified by at least 50 reads. Principal  
30 **315** component (PC) 1 and 2 account for 88% of overall variance.  
31 **316**

32 **317** **Supplemental Figure 1.** Duplication plots for all samples, produced using SeqMonk (Babraham  
33 **318** Bioinformatics).  
34 **319**

35 **320** **Supplemental Figure 2.** **(A)** Cumulative plots of the coefficient of variance (CV) of experimental  
36 **321** each group, including transcripts identified by at least one read. Average CVs of <25% are  
37 **322** found in ~85% of transcripts. **(B)** Principal component analysis (PCA) including transcripts  
38 **323** identified by at least one read. The majority (88%) of overall variance is explained by Principal  
39 **324** components (PC) 1 and 2.  
40  
41  
42  
43  
44  
45  
46  
47  
48  
49  
50  
51  
52  
53  
54  
55  
56  
57  
58  
59  
60  
61  
62  
63  
64  
65



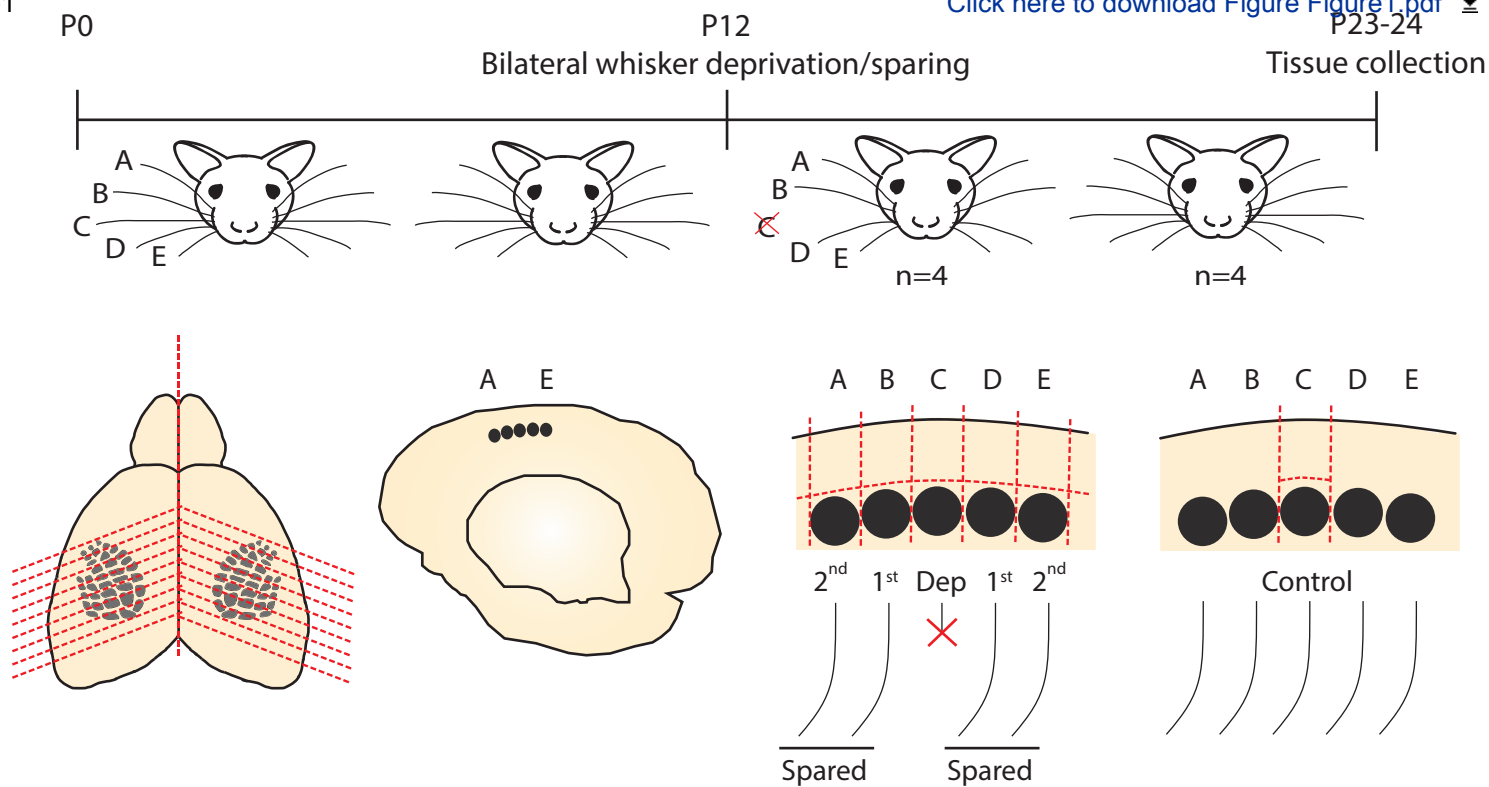**B**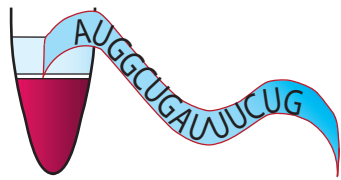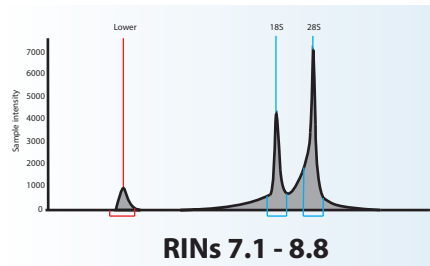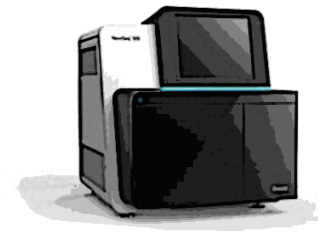

RNA isolation, quality control and sequencing

**C**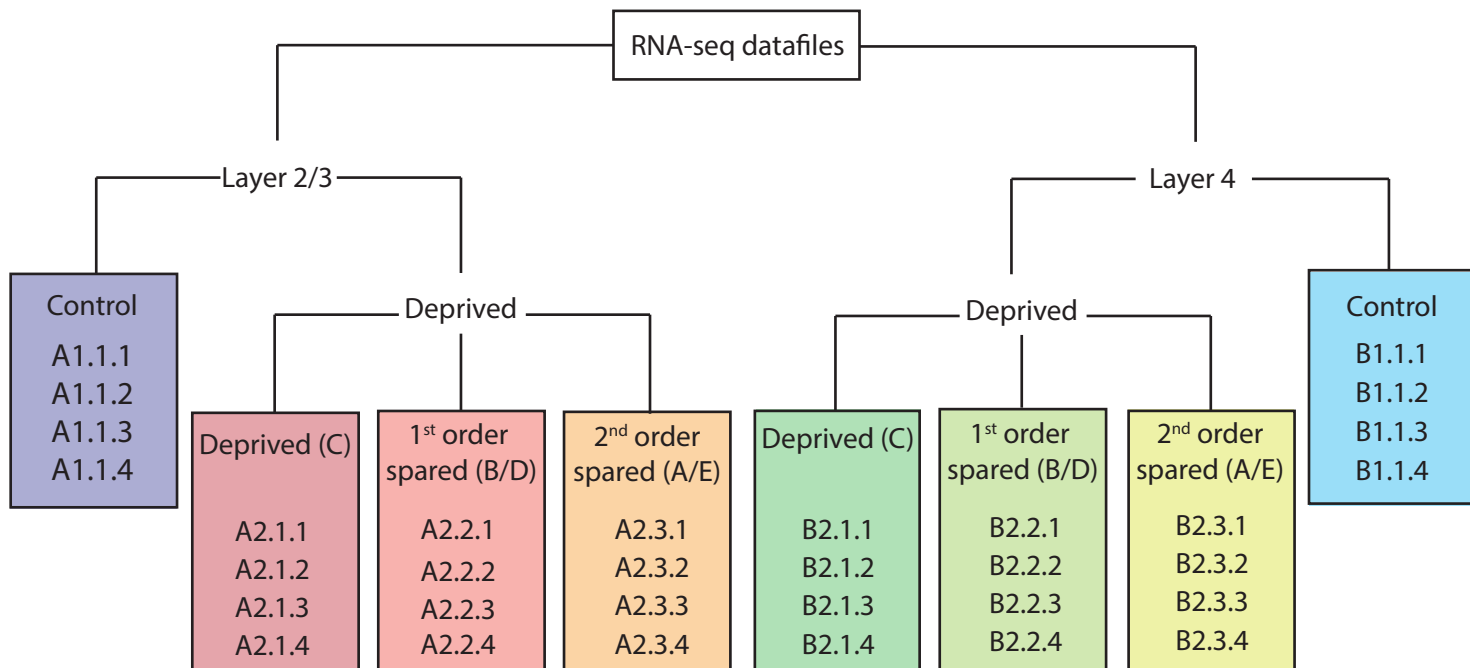

Figure2

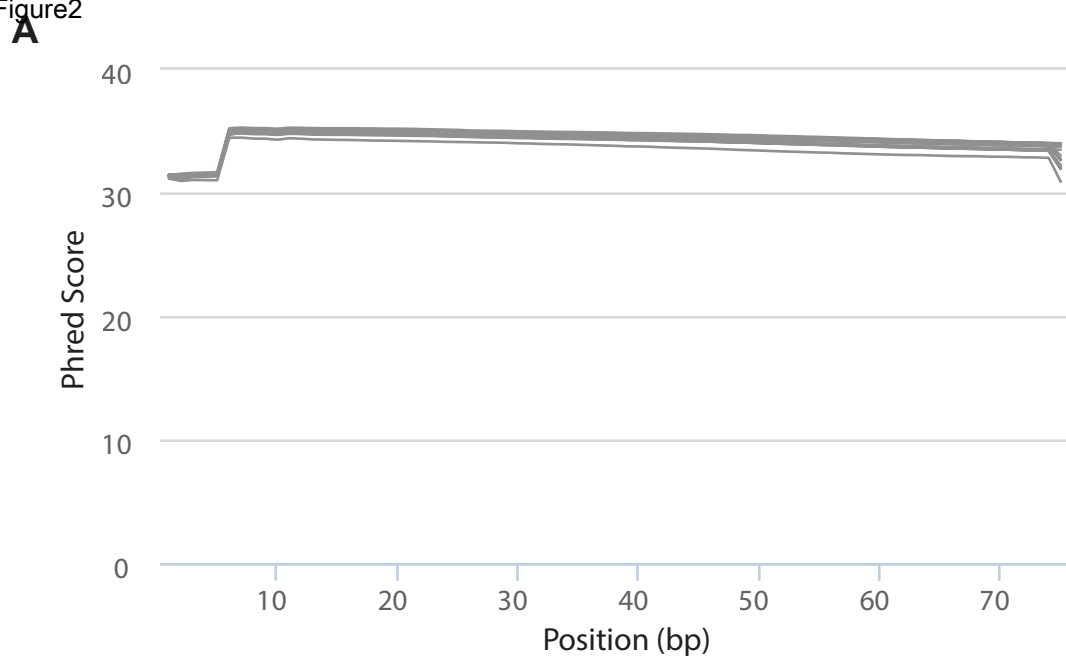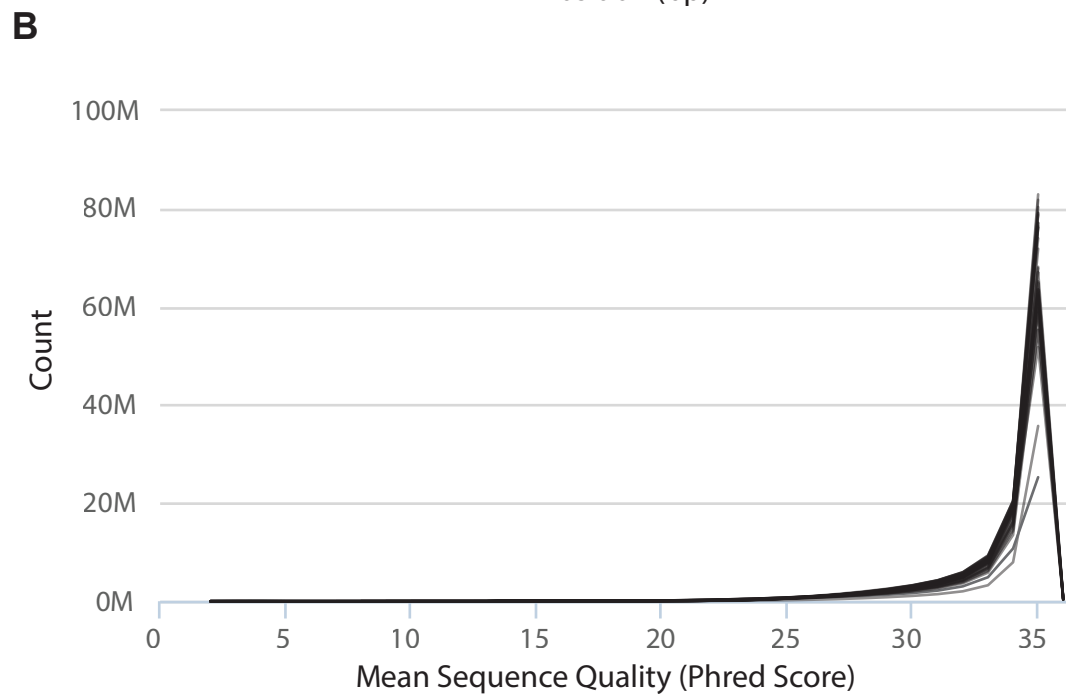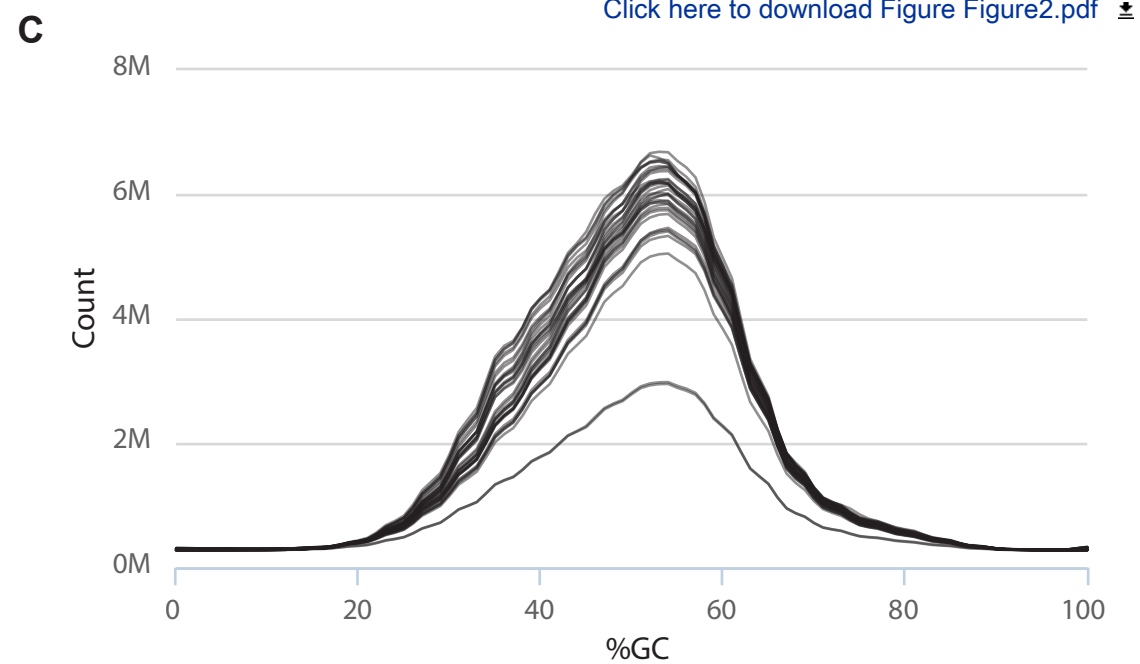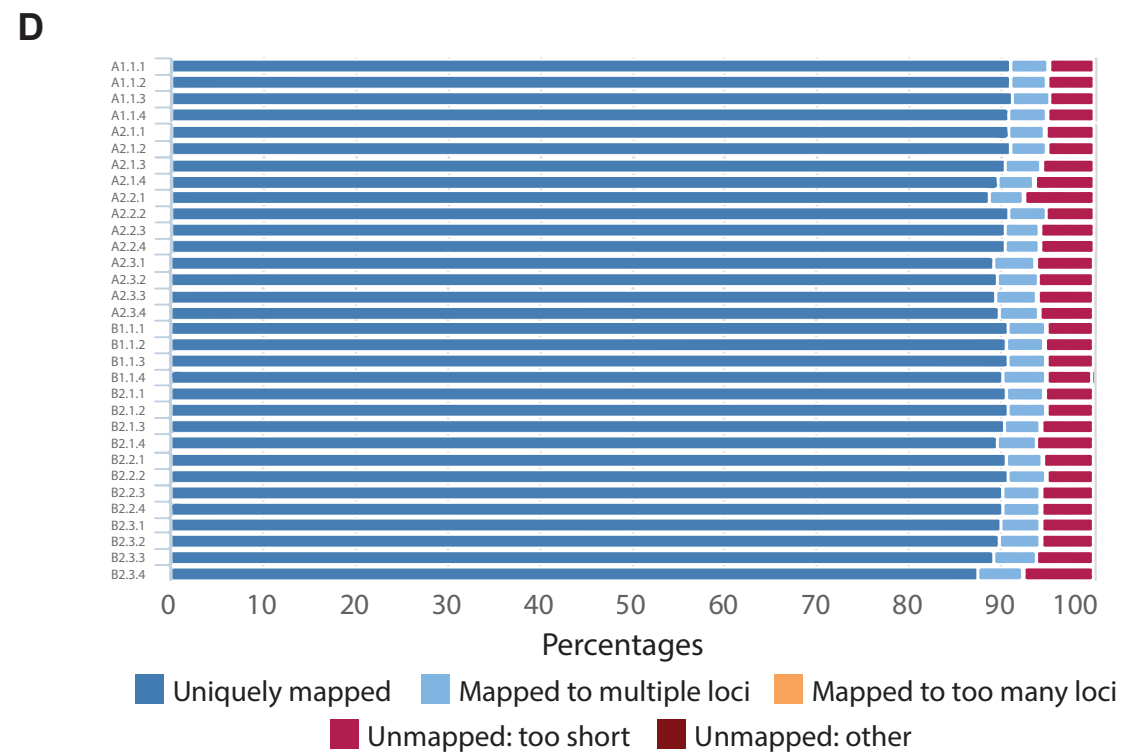

Figure3

[Click here to download Figure Figure3.pdf](#)

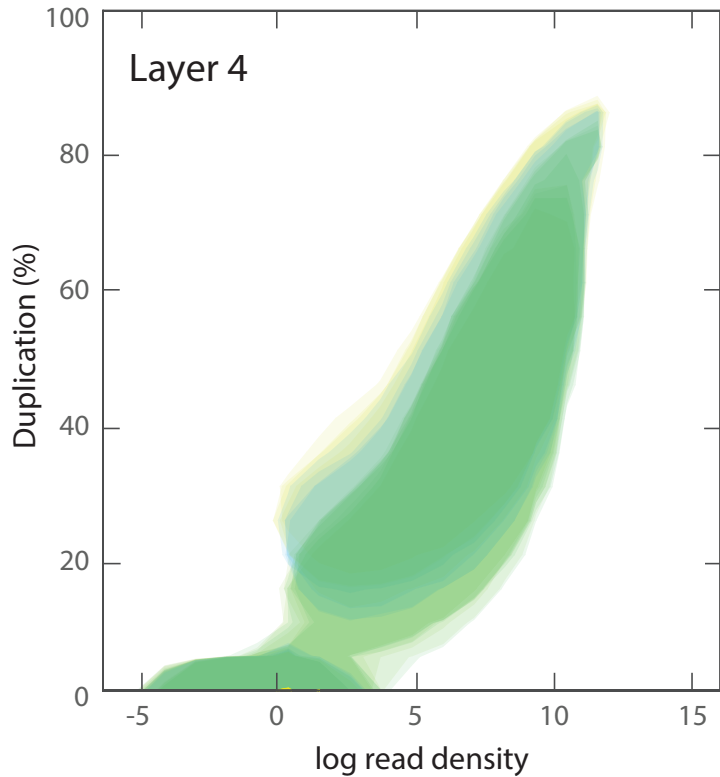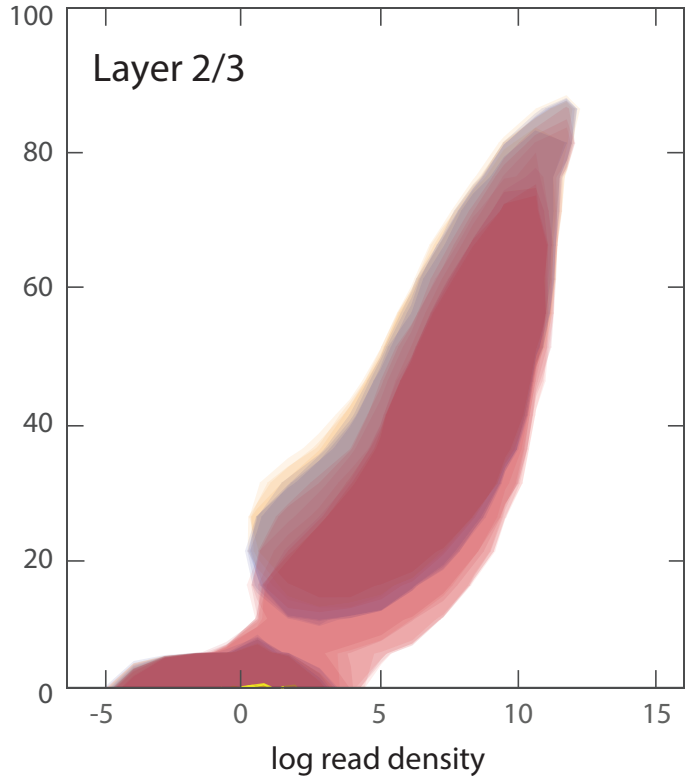

Figure 4

[Click here to download Figure Figure\\_4.pdf](#)**A**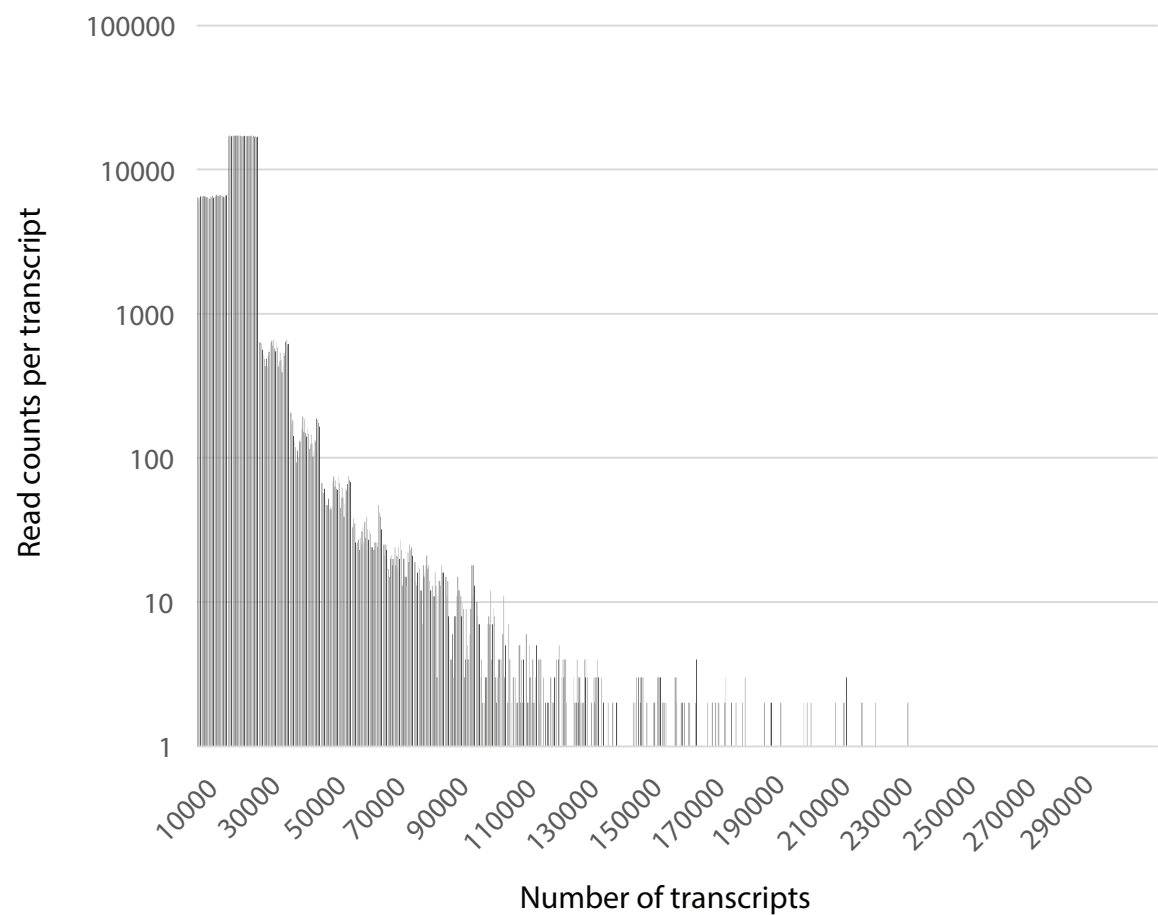**B**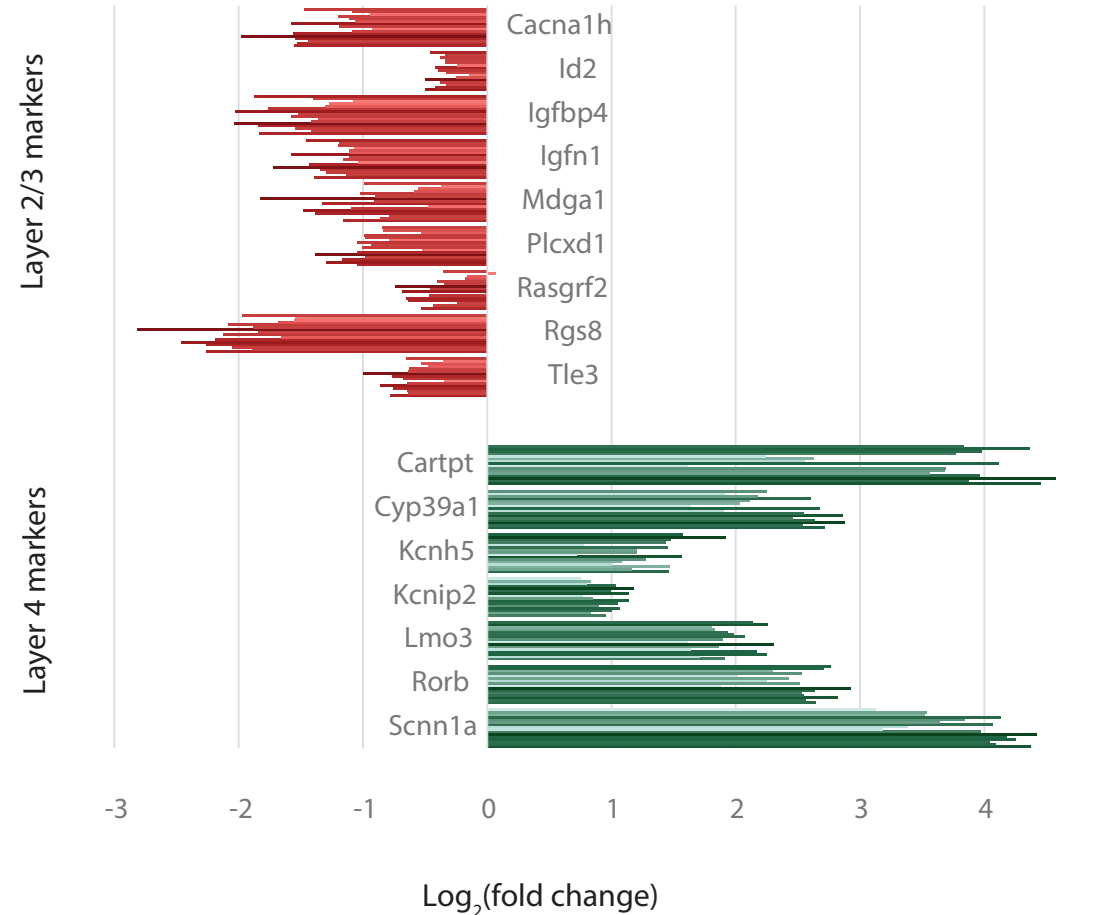**C**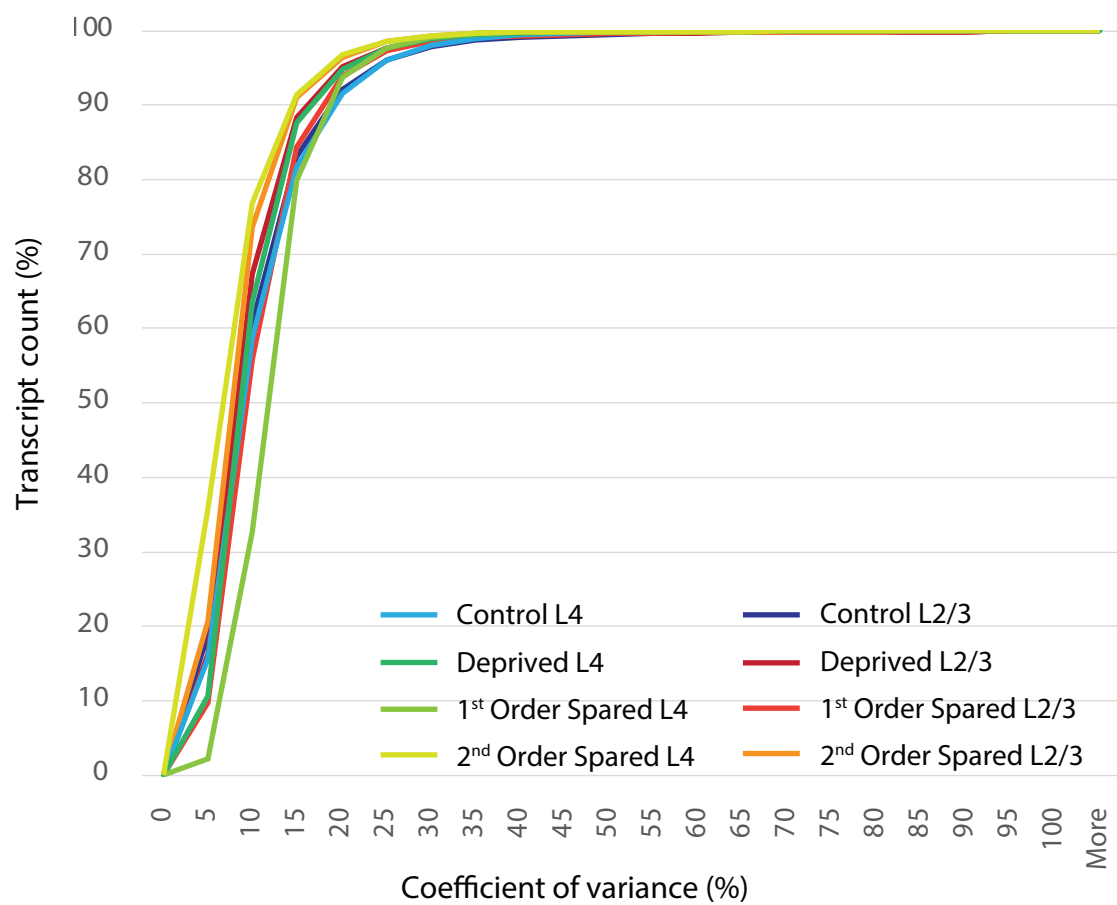**D**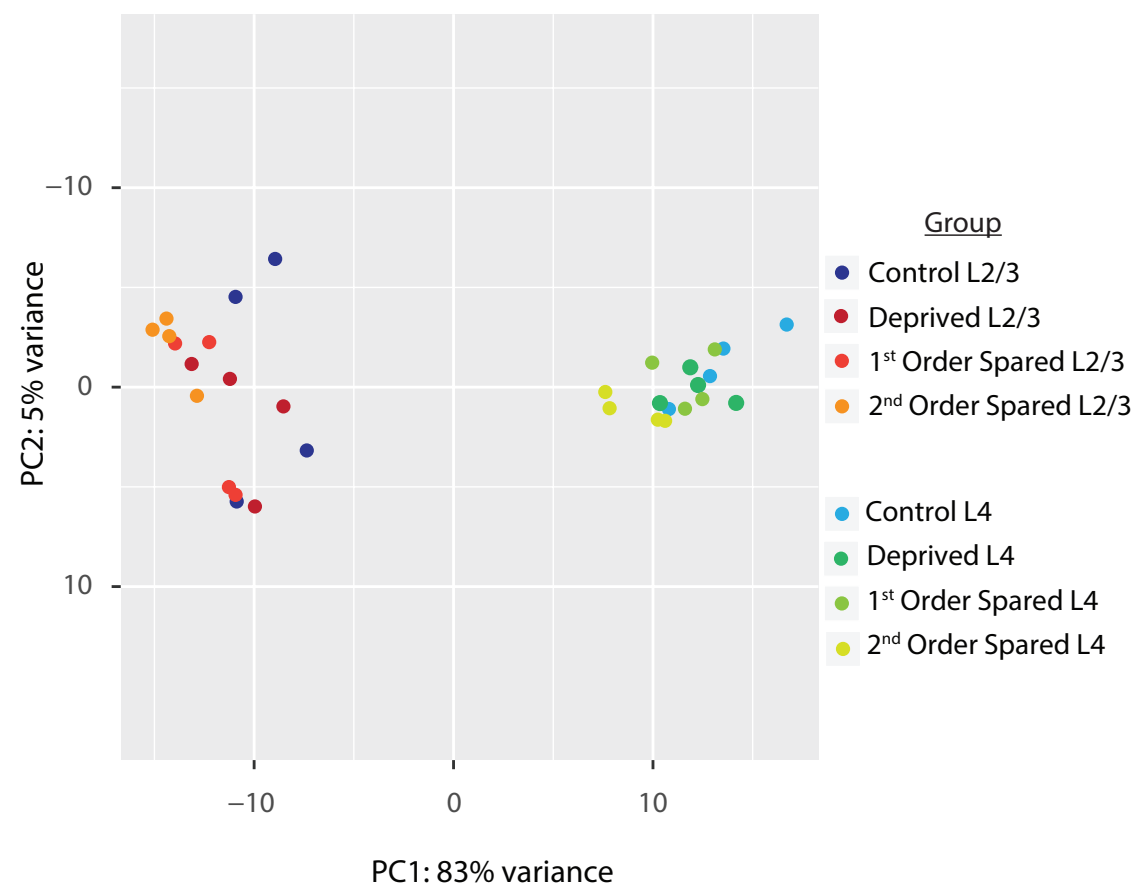

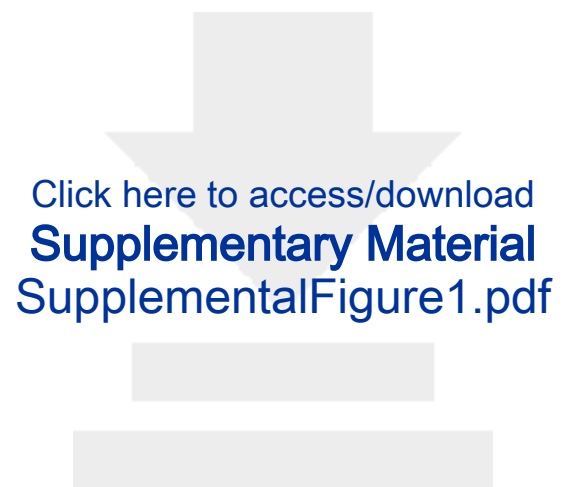

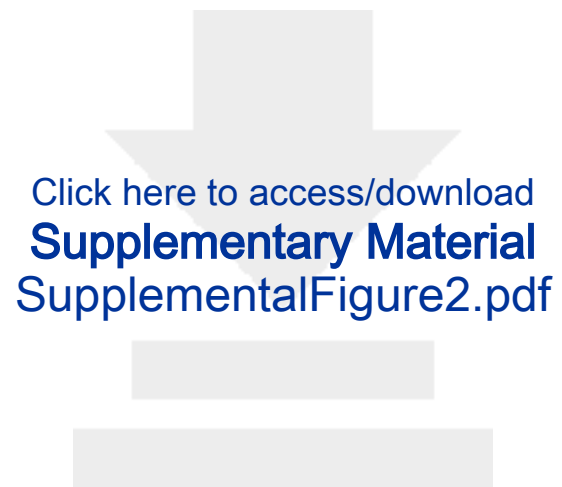

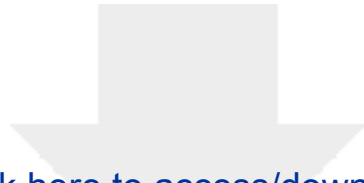

[Click here to access/download](#)

**Supplementary Material**

[Supplementary\\_Table1\\_EdgeRcommands.txt](#)

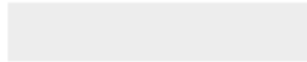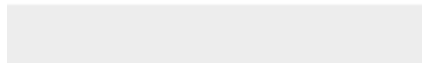

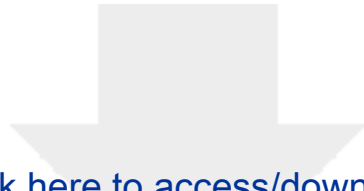

Click here to access/download

**Supplementary Material**

Gigascience\_Kole\_RevisedRound2.docx



Supplement: gix081_GIGA-D-16-00170_Revision-2.pdf [file gix081_GIGA-D-16-00170_Revision-2.pdf]
