# Supplementary material for: Transcriptional mapping of the primary somatosensory cortex upon sensory deprivation
Source: PubMed Central journal article supplement (PMC5965344; doi:10.1093/gigascience/gix081), 2017-08-23
Supplement: gix081_Response-to-Reviewer-Comments_Revision-2.pdf [file gix081_Response-to-Reviewer-Comments_Revision-2.pdf]

## **Author's Response To Reviewer Comments**

As requested, the comments by Dr. Nogoy have been addressed. Specifically, keywords and funding information were added, and the references have been checked.
